# Supplementary material for: The Correlation between Stress Levels among Undergraduate Medical Students and Their Motivation for Studying Medicine
Source: Hindawi journal article supplement (doi:10.1155/2022/1605435), 2022-05-13
Supplement: f1 [file 1605435.f1.docx]

**The correlation between stress levels among undergraduate medicals students and their motivation for studying medicine**

**Supplementary Data**

Amna A. Alotiby

Department of Haematology and Immunology, Faculty of Medicine, Umm Al-Qura University, Makkah, Saudi Arabia

***Corresponding author**: Amna A. Alotiby

Department of Haematology and Immunology

Faculty of Medicine, Umm Al-Qura University

Makkah, Saudi Arabia

aamogaty@uqu.edu.sa

Table 1. Kessler 10 Psychological Distress (k10) frequency distribution among sampled medical students, Saudi Arabia

| **K10 items** | **None of the time** | | **A little of the time** | | **Some of the time** | | **Most of the time** | | **All of the time** | |
| --- | --- | --- | --- | --- | --- | --- | --- | --- | --- | --- |
| **No** | **%** | **No** | **%** | **No** | **%** | **No** | **%** | **No** | **%** |
| About how often did you feel tired out for no good reason? | 30 | 5.2% | 109 | 19.1% | 196 | 34.3% | 180 | 31.5% | 57 | 10.0% |
| About how often did you feel nervous? | 8 | 1.4% | 80 | 14.0% | 185 | 32.3% | 191 | 33.4% | 108 | 18.9% |
| About how often did you feel so nervous that nothing could calm you down? | 119 | 20.8% | 174 | 30.4% | 141 | 24.7% | 96 | 16.8% | 42 | 7.3% |
| About how often did you feel hopeless? | 120 | 21.0% | 146 | 25.5% | 125 | 21.9% | 123 | 21.5% | 58 | 10.1% |
| About how often did you feel restless or fidgety? | 55 | 9.6% | 124 | 21.7% | 194 | 33.9% | 128 | 22.4% | 71 | 12.4% |
| About how often did you feel so restless you could not sit still? | 149 | 26.0% | 161 | 28.1% | 162 | 28.3% | 63 | 11.0% | 37 | 6.5% |
| About how often did you feel depressed? | 67 | 11.7% | 139 | 24.3% | 149 | 26.0% | 108 | 18.9% | 109 | 19.1% |
| About how often did you feel that everything was an effort? | 36 | 6.3% | 144 | 25.2% | 186 | 32.5% | 130 | 22.7% | 76 | 13.3% |
| About how often did you feel so sad that nothing could cheer you up? | 106 | 18.5% | 169 | 29.5% | 150 | 26.2% | 95 | 16.6% | 52 | 9.1% |
| About how often did you feel worthless? | 179 | 31.3% | 130 | 22.7% | 117 | 20.5% | 75 | 13.1% | 71 | 12.4% |
